# Supplementary material
Source: PubMed Central journal article supplement (PMC5588775)
Supplement: IMM-152-287-s001.pdf [file IMM-152-287-s001.pdf]

## Supplementary Figure 1

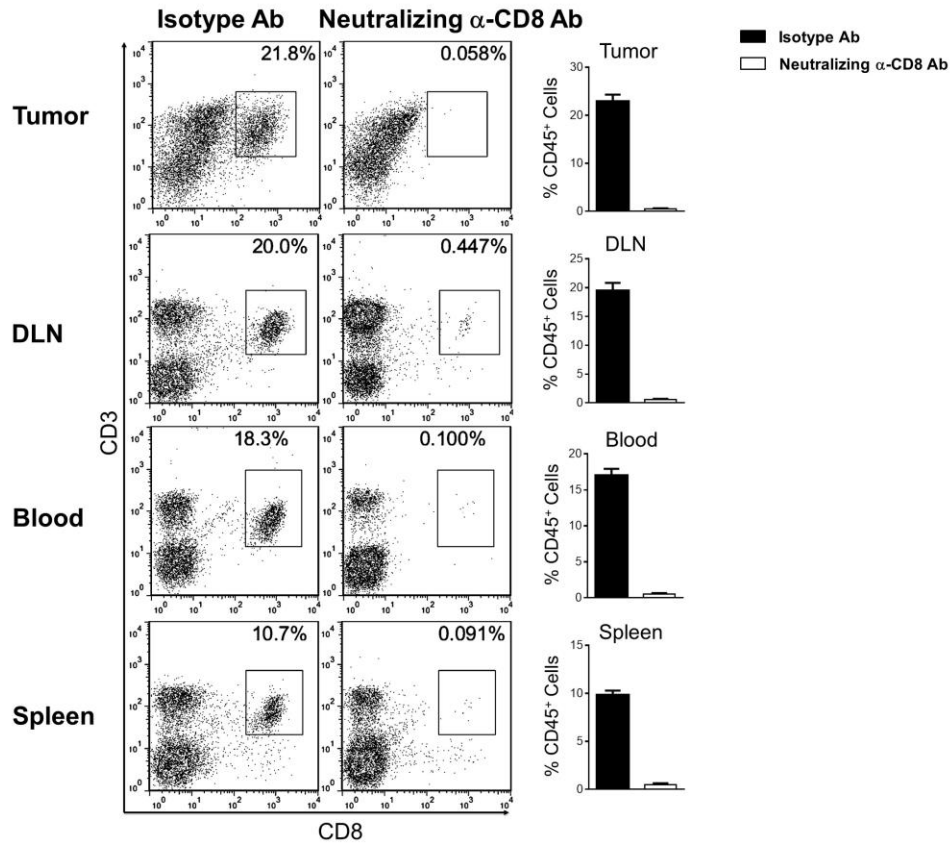

### Supplementary Figure 1. The efficiency of CD8<sup>+</sup> T cell depletion.

Representative flow cytometry dot plots showing frequencies of CD8<sup>+</sup> T cells in the tumor, DLN, blood and spleen of mice treated with neutralizing anti-CD8 antibody or isotype control antibody, and quantifications of frequencies of CD8<sup>+</sup> T cells. Columns and error bars represent mean $\pm$ SEM (n=4-5 mice per group). Similar results were obtained from three independent experiments.

## Supplementary Figure 2

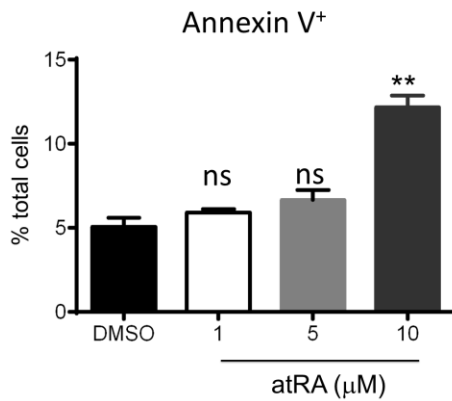

### Supplementary Figure 2. AtRA at 10 μM induced apoptosis of B16F10 cells.

Apoptosis detection was performed with the FITC Annexin V Apoptosis Detection Kit (556547, BD).

The percentages of Annexin V<sup>+</sup> apoptotic cells in atRA or DMSO-treated B16F10 cells were detected by flow cytometry. \*\* $p < 0.01$ , *ns* = no significance. Columns and error bars represent of three replicate wells from a representative of three independent experiments.

### Supplementary Figure 3

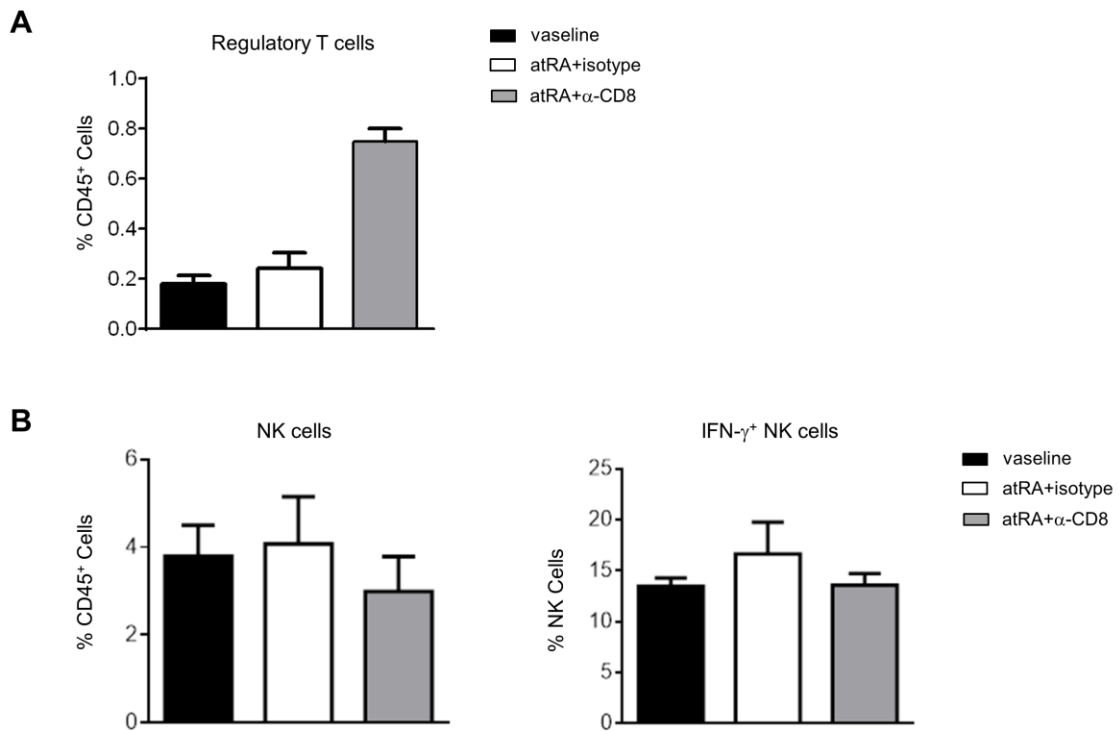

**Supplementary Figure 3. Topical atRA treatment has no effect on tumor-infiltrating Tregs and NK cells.**

(A-B) Averaged percentages of Tregs (CD4<sup>+</sup> CD25<sup>+</sup> Foxp3<sup>+</sup>) (A), as well as NK cells (CD3<sup>-</sup> NK1.1<sup>+</sup>), and IFN- $\gamma$ <sup>+</sup> NK cells (B) in enzymatically dissociated tumor cells. Columns and error bars represent mean $\pm$ SEM (n=5-7 per group). Similar results were obtained from three independent experiments.
